# Supplementary material for: Identification and evaluation of tumor pyroptosis-associated antigens for design a vaccine candidate against lung cancer
Source: Sci Rep. 2026 Mar 19;16:9559. doi: 10.1038/s41598-024-84792-4 (PMC13009229; doi:10.1038/s41598-024-84792-4)
Supplement: Supplementary file 1 — Supplementary Material 1. [file 41598_2024_84792_MOESM1_ESM.xlsx]

## Sheet: B-cell
B-cell (BepiPred-3.0)
CARD8
Epitopes	Vaxijen Score	Antigenicty	Allergenicity	IFN-γ induction	Interleukin-4	Interleukin-10	Toxicity
MEKKECPEKSSSSEEELPRRDSGSSRNI	0.531	Antigen	Non-allergen	Positive	Non-inducer
CQLSGGDIPSVSEEQESSEGQDSGDICSE	0.8016	Antigen	Allergen
FDVTAEPEEAV	1.2134	Antigen	Allergen
LQTSPPMEPLNF	0.7621	Antigen	Non-allergen	Negative
ASAPPPFSGA	0.6702	Antigen	Allergen
KELVEQEKTRQSK	0.8808	Antigen	Non-allergen	Negative
NAIP
Epitopes	Vaxijen Score	Antigenicty	Allergenicity	IFN-γ induction	Interferon-4	Interferon-10	Toxicity
MATQQKASDERIS	0.707	Antigen	Non-allergen	Negative
ELEEEEQKERAKMQKGYNSQMRS	0.8518	Antigen	Non-allergen	Positive	Inducer	Inducer	Non-toxin
GNWEEGDDPWKEH	-0.3675	Non-antigen
KDWPRESAV	0.014	Non-antigen
KWQEGDDPLDDH	-0.4094	Non-antigen
KSSAEVTPDLQSR	0.6283	Antigen	Non-allergen	Negative
IVPEMAQGEAQWF	0.2871	Non-antigen
DDLAEAGVDEDED	0.8899	Antigen	Non-allergen	Negative
SLPSTKAGPK	0.5249	Antigen	Non-allergen	Negative
ESLENISENDDYLKH	0.9536	Antigen	Non-allergen	Positive	Inducer	Inducer	Non-toxin
RGNKTSPRA	1.2926	Antigen	Allergen
RRASPDLST	0.1151	Non-antigen
QQFPDEETSE	-0.2486	Non-antigen
NLRP1
Epitopes	Vaxijen Score	Antigenicty	Allergenicity	IFN-γ induction	Interferon-4	Interferon-10	Toxicity
HSRSSSGETPAQPEKTSGM	0.681	Antigen	Allergen
AQEGAGHSPSFPYSPSEPHLGSPSQPTST	0.6761	Antigen	Allergen
PHPRSQDPLVKRSWPDYVEEN	0.021	Non-antigen
GKDGTATPAP	0.8722	Antigen	Non-allergen	Positive	Inducer	Non-inducer
VDEPGWVLQEPS	0.6908	Antigen	Non-allergen	Positive	Non-inducer
EDEKGRGKH	1.5801	Antigen	Non-allergen	Negative
PSVMTPTEGLDTGEMSNSTSSL	0.8923	Antigen	Non-allergen	Positive	Non-inducer
IAEESSPEV	0.9014	Antigen	Allergen
RIAVPSPLDA	0.8485	Antigen	Non-allergen	Negative
NLRP3
Epitopes	Vaxijen Score	Antigenicty	Allergenicity	IFN-γ induction	Interferon-4	Interferon-10	Toxicity
EDYPPQKGCIPLPRGQTEKADH	0.1788	Non-antigen
EKAKRDEPKWGSDNARVS	0.5203	Antigen	Non-allergen	Positive	Inducer	Non-inducer
TKTCESPVSP	0.0943	Non-antigen
DPDDEHSEPV	-0.6977	Non-antigen
CPDPNPPIH	0.6875	Antigen	Allergen
QQMESGKSLAQTSKTT	0.9124	Antigen	Non-allergen	Positive	Inducer	Inducer	Non-toxin
QPRGGSQEH	1.9011	Antigen	Allergen
EKEGRTNVPGS	1.0447	Antigen	Non-allergen	Positive	Non-inducer
PKEEEEEEKEGR	0.8013	Antigen	Allergen

## Sheet: MHCII
MHC-II (NetMHCIIpan-4.3)
CARD8
Alllele	Epitope	Binding affinity	Vaxijen Score	Antigenicty	Allergenicity (allertop)	IFN-γ induction	Interleukin-4	Interleukin-10	Toxicity
DRB1_0101	LPHFISLQAGEVDVS	5.51	0.7322	Antigen	Non-allergen	Positive	Inducer	Non-inducer
	HLPHFISLQAGEVDV	6.03	0.9771	Antigen	Allergen
	PHFISLQAGEVDVSW	6.56	0.5119	Antigen	Non-allergen	Positive	Inducer	Non-inducer
	KNEGMVLEHPARVEP	14.93	1.0034	Antigen	Allergen
	NEGMVLEHPARVEPF	10.94	1.0584	Antigen	Allergen
	IHLPHFISLQAGEVD	7.83	1.1411	Antigen	Non-allergen	Positive	Inducer	Non-inducer
	FKNEGMVLEHPARVE	17.39	0.9032	Antigen	Allergen
DRB1_0301	CFEIEEDYKNRQFLG	58.74	-0.2152	Non-antigen
	FEIEEDYKNRQFLGP	58.54	-0.2132	Non-antigen
	KEPIQLEITEKRHGT	70.88	0.7065	Antigen	Allergen
	MKEPIQLEITEKRHG	81.74	0.6439	Antigen	Non-allergen	Positive	Inducer	Non-inducer
	VCFEIEEDYKNRQFL	52.96	-0.1209	Non-antigen
	KVCFEIEEDYKNRQF	83.85	-0.1519	Non-antigen
	SRKLLVDNSIRELQY	14.39	0.3073	Non-antigen
	GSRKLLVDNSIRELQ	17.22	0.239	Non-antigen
	QMKEPIQLEITEKRH	85.07	0.6137	Antigen	Non-allergen	Positive	Inducer	Inducer	Non-toxin
	EPIQLEITEKRHGTL	93.62	0.9321	Antigen	Allergen
DRB1_0701	FGSSYIVSNSANLKV	12.97	0.2614	Non-antigen
	NFGSSYIVSNSANLK	15.32	0.319	Non-antigen
	GSSYIVSNSANLKVM	12.53	0.497	Non-antigen
	ENQIVSSYASKVCFE	20.83	0.1443	Non-antigen
	EENQIVSSYASKVCF	18.18	0.3578	Non-antigen
	SEENQIVSSYASKVC	20.49	0.7264	Non-antigen
	IRELQYTKTGIFFQA	14.89	0.3032	Non-antigen
	LNFGSSYIVSNSANL	15.23	0.282	Non-antigen
	SIRELQYTKTGIFFQ	15.21	0.284	Non-antigen
	SSYIVSNSANLKVMP	14.6	0.5976	Antigen	Non-allergen	Negative
DRB1_0801	NEALLSMVEKKGDLA	178.46	0.7734	Antigen	Allergen
DRB1_0901	ENQIVSSYASKVCFE	30.69	0.1443	Non-antigen
	FGSSYIVSNSANLKV	37.53	0.2614	Non-antigen
	NFGSSYIVSNSANLK	45.56	0.319	Non-antigen
	GSSYIVSNSANLKVM	33.49	0.497	Non-antigen
	EENQIVSSYASKVCF	27.68	0.3578	Non-antigen
	SEENQIVSSYASKVC	31.69	0.7264	Non-antigen
DRB1_1001	LPHFISLQAGEVDVS	18.22	0.7322	Antigen
	KNEGMVLEHPARVEP	60.49	1.0034	Antigen
	NEGMVLEHPARVEPF	45.31	1.0584	Antigen
	HLPHFISLQAGEVDV	18.87	0.9771	Antigen
	PHFISLQAGEVDVSW	23.07	0.5119	Antigen
DRB1_1101	PIQLEITEKRHGTLV	24.6	0.736	Antigen	Allergen
	EPIQLEITEKRHGTL	31.81	0.9321	Antigen
	KEPIQLEITEKRHGT	51.8	0.7065	Antigen
DRB1_1301	PGEIQHFSKFYAGQM	82.2	0.8011	Antigen	Allergen
	SPGEIQHFSKFYAGQ	104.91	0.7842	Antigen	Allergen
	RSPGEIQHFSKFYAG	136.43	0.6054	Antigen	Allergen
	GEIQHFSKFYAGQMK	91.02	0.9603	Antigen	Allergen
	EKELVEQEKTRQSKN	451.96	0.6832	Antigen	Non-allergen	Negative
DRB1_1401	LIRLQGSRKLLVDNS	22.46	0.3525	Non-antigen
	NEVLTENEKELVEQE	1224.39	0.755	Antigen	Allergen
	KLIRLQGSRKLLVDN	19.48	0.5038	Antigen	Allergen
	DNEVLTENEKELVEQ	1110.9	0.7493	Antigen	Allergen
	QDNEVLTENEKELVE	1140.45	0.7609	Antigen	Allergen
	SKLIRLQGSRKLLVD	17.36	0.4478	Non-antigen
	IRLQGSRKLLVDNSI	32.56	0.2406	Non-antigen
DRB1_1501	ENQIVSSYASKVCFE	45.94	0.1443	Non-antigen
	NQIVSSYASKVCFEI	50.49	0.1837	Non-antigen
	SKLIRLQGSRKLLVD	5.46	0.4478	Non-antigen
NAIP
Alllele	Epitope	Binding affinity	Vaxijen Score	Antigenicty	Allergenicity	IFN-γ induction	Interleukin-4	Interleukin-10	Toxicity
DRB1_0101	KMRYQEEEARLASFR	14.66	1.169	Antigen	Non-allergen	Positive	Inducer	Non-inducer
	SGGFQKLENLKLSIN	5.17	0.9726	Antigen	Non-allergen	Negative
	GKMRYQEEEARLASF	18.94	1.1007	Antigen	Non-allergen	Positive	Inducer	Inducer	Non-toxin
	ISGGFQKLENLKLSI	5.71	0.8156	Antigen	Non-allergen	Negative
	CPQAYFSMVSEHLLV	3.04	0.2696	Non-antigen
	PFVLQFLQGRTLTLG	3.41	0.3496	Non-antigen
	GGKMRYQEEEARLAS	30.82	1.1347	Antigen	Non-allergen	Negative
	PQAYFSMVSEHLLVL	3.11	0.2224	Non-antigen
	AISGGFQKLENLKLS	7.84	0.9337	Antigen	Allergen
	ICPQAYFSMVSEHLL	3.36	0.282	Non-antigen
	GGFQKLENLKLSINH	6.11	1.026	Antigen	Non-allergen	Negative
	LSALLGLDAVQLAKE	7.92	0.0838	Non-antigen
	SPFVLQFLQGRTLTL	3.76	0.1016	Non-antigen
DRB1_0401	NEQLRAAYTSASFRH	26.29	0.6321	Antigen	Non-allergen	Negative
	LNEQLRAAYTSASFR	30.6	0.6692	Antigen	Non-allergen	Positive	Non-inducer
	RTCLLIAVRTNRARD	18.9	0.6724	Antigen	Non-allergen	Negative
	TCLLIAVRTNRARDI	15.49	0.9094	Antigen	Non-allergen	Negative
	NNFLNYVSSLPSTKA	16.17	0.967	Antigen	Non-allergen	Negative
	RNFFQALDNMPNLQE	25.54	1.3764	Antigen	Allergen
DRB1_0701	LENLKLSINHKITEE	9.15	0.599	Antigen	Allergen
	KLENLKLSINHKITE	8.57	1.0138	Antigen	Non-allergen	Negative
	AVPFVASLPNFISLK	4.65	1.105	Antigen	Non-allergen	Positive	Inducer	Non-inducer
	FQAVPFVASLPNFIS	4.99	1.1169	Antigen	Non-allergen	Positive	Inducer	Non-inducer
	QKLENLKLSINHKIT	8.2	0.9403	Antigen	Non-allergen	Negative
	ENLKLSINHKITEEG	11.19	0.9094	Antigen	Allergen
	QAVPFVASLPNFISL	4.87	1.1814	Antigen	Non-allergen	Positive	Inducer	Non-inducer
DRB1_0801	EEGYRNFFQALDNMP	237.17	0.9777	Antigen	Allergen
	KCEFLRSKKSSEEIT	160.14	0.8427	Antigen	Allergen
DRB1_0901	LENLKLSINHKITEE	36.79	0.599	Antigen
	KLENLKLSINHKITE	34.66	1.0138	Antigen
	AVPFVASLPNFISLK	10.24	1.105	Antigen
	FQAVPFVASLPNFIS	11.27	1.1169	Antigen
	SDSFFQAVPFVASLP	29.54	0.7292	Antigen	Non-allergen	Positive	Inducer	Non-inducer
	QAVPFVASLPNFISL	11.05	1.1814	Antigen
	QKLENLKLSINHKIT	33.65	0.9403	Antigen
	ENLKLSINHKITEEG	45.28	0.9094	Antigen
	KFSDSFFQAVPFVAS	24.49	0.514	Antigen	Allergen
DRB1_1001	RNFFQALDNMPNLQE	9.1	1.3764	Antigen
	YRNFFQALDNMPNLQ	8.96	1.4123	Antigen	Allergen
	LRPFYRFLSPAFQEF	5.67	0.8465	Antigen	Allergen
	RLRPFYRFLSPAFQE	6.63	0.8289	Antigen	Non-allergen	Positive	Non-inducer
	RPFYRFLSPAFQEFL	5.26	0.6267	Antigen	Allergen
	SEKFAYILGSLSNLE	4.06	0.8321	Antigen	Non-allergen	Positive	Inducer	Inducer	Non-toxin
	NFFQALDNMPNLQEL	11.85	1.7627	Antigen	Allergen
	GYRNFFQALDNMPNL	10.25	1.4029	Antigen	Allergen
	KMRYQEEEARLASFR	62.5	1.169	Antigen
	SDSFFQAVPFVASLP	9.52	0.7292	Antigen
	EKLLIQISAEYDPSK	44.75	0.1012	Non-antigen
	TSEKFAYILGSLSNL	4.31	0.8787	Antigen	Allergen
DRB1_1101	NVKSYMDMQRRASPD	15.04	0.3364	Non-antigen
	VKSYMDMQRRASPDL	11.82	0.1609	Non-antigen
	DNVKSYMDMQRRASP	13.32	0.4439	Non-antigen
	SRHFTECIKAQATTV	35.55	0.397	Non-antigen
	ISRHFTECIKAQATT	45.36	0.3603	Non-antigen
	MQKGYNSQMRSEAKR	164.85	1.007	Antigen	Non-allergen	Negative
	KSYMDMQRRASPDLS	13.92	-0.0626	Non-antigen
	QKGYNSQMRSEAKRL	102.21	0.976	Antigen	Non-allergen	Negative
	GCDLSIASKHISKPV	12.58	0.1888	Non-antigen
	LGCDLSIASKHISKP	15.08	0.1553	Non-antigen
DRB1_1201	PESLSLLRSIHFPIR	11.57	0.9515	Antigen	Non-allergen	Negative
	SLKILNLEGQQFPDE	80.08	0.1976	Non-antigen
	HPESLSLLRSIHFPI	12.61	0.9475	Antigen	Non-allergen	Negative
	ISLKILNLEGQQFPD	70.53	0.0646	Non-antigen
	DHPESLSLLRSIHFP	13.23	1.046	Antigen	Non-allergen	Negative
	LETILEIKAFPFYNT	14.99	0.3467	Non-antigen
	YLETILEIKAFPFYN	14.69	0.4492	Non-antigen
	LKILNLEGQQFPDEE	113.88	0.187	Non-antigen
	ETILEIKAFPFYNTV	17.6	0.4566	Non-antigen
	FISLKILNLEGQQFP	55.21	0.0225	Non-antigen
	RYLETILEIKAFPFY	14.33	0.4674	Non-antigen
	ESLSLLRSIHFPIRG	13.24	0.8372	Antigen	Allergen
	CVRNIIQQLKNQVLF	52.02	0.5359	Antigen	Allergen
	VRNIIQQLKNQVLFL	46.07	0.5443	Antigen	Allergen
	RNIIQQLKNQVLFLL	45.25	0.3982	Non-antigen
	ADDIALLNVMKERHP	170.45	0.7153	Antigen	Allergen
	FDHPESLSLLRSIHF	14.74	1.1416	Antigen	Non-allergen	Negative
	MEKLLIQISAEYDPS	91.61	0.1221	Non-antigen
DRB1_1301	ASQRIELHLNHSRGF	11.45	0.0204	Non-antigen
	SQRIELHLNHSRGFI	8.26	-0.1108	Non-antigen
	SASQRIELHLNHSRG	23.35	0.2664	Non-antigen
	AQRLRPFYRFLSPAF	10.46	0.7916	Antigen	Non-allergen	Positive	Non-inducer
	TAQRLRPFYRFLSPA	12.75	0.9198	Antigen	Non-allergen	Positive	Non-inducer
	RKFMVYFGKNQSLQK	41.08	0.246	Non-antigen
	QRIELHLNHSRGFIE	8.8	-0.1835	Non-antigen
	GCDLSIASKHISKPV	13.61	0.1888	Non-antigen
	LGCDLSIASKHISKP	17.04	0.1553	Non-antigen
	KYDIRVKNLKSRLRG	6.31	1.3449	Antigen	Non-allergen	Positive	Inducer	Inducer	Non-toxin
	RTCLLIAVRTNRARD	7.48	0.6724	Antigen
DRB1_1401	DDSVVEIAKVAISGG	366.88	0.4468	Non-antigen
	NDDSVVEIAKVAISG	343.34	0.4232	Non-antigen
	TGDGIYRVAKLIIQQ	64.66	0.3073	Non-antigen
	LNDDSVVEIAKVAIS	287.18	0.1934	Non-antigen
	PTGDGIYRVAKLIIQ	62.21	0.2696	Non-antigen
	GDGIYRVAKLIIQQC	88.93	0.4596	Non-antigen
	NQSLQKIQKTPLFVA	49.45	0.2337	Non-antigen
	DSVVEIAKVAISGGF	347.66	0.3116	Non-antigen
	KNQSLQKIQKTPLFV	72.7	0.4189	Non-antigen
	GKNQSLQKIQKTPLF	84.46	0.7975	Antigen	Non-allergen	Negative
	NKDVGNIAKYDIRVK	527.45	0.3893	Non-antigen
DRB1_1501	CNDSIFAYEELRLDS	36.56	0.5665	Antigen	Non-allergen	Positive	Non-inducer
	NDSIFAYEELRLDSF	30.3	0.6834	Antigen	Non-allergen	Positive	Inducer	Non-inducer
	EARLASFRNWPFYVQ	7.26	1.3427	Antigen	Non-allergen	Negative
	YCNDSIFAYEELRLD	46.02	0.3684	Non-antigen
	EEARLASFRNWPFYV	7.88	1.4745	Antigen	Non-allergen	Negative
	TQYIQSYKGFVDITG	47.71	-0.1146	Non-antigen
	ARDIRRYLETILEIK	29.29	0.6848	Antigen	Non-allergen	Negative
	ITQYIQSYKGFVDIT	40.55	-0.1461	Non-antigen
	EEEARLASFRNWPFY	9.96	1.3043	Antigen	Allergen
	DSIFAYEELRLDSFK	38.02	0.7506	Antigen	Non-allergen	Positive	Inducer	Non-inducer
	VRNIIQQLKNQVLFL	21.67	0.5443	Antigen
	ARLASFRNWPFYVQG	8.51	1.3501	Antigen	Allergen
	RARDIRRYLETILEI	36.68	0.8954	Antigen	Non-allergen	Negative
	MMTVSAYNNFLNYVS	44.82	1.1631	Antigen	Allergen
	QYIQSYKGFVDITGE	62.15	0.061	Non-antigen
	FDDVAVFKSYMERLS	21.57	0.8387	Antigen	Non-allergen	Positive	Inducer	Non-inducer
	EDNVKSYMDMQRRAS	141.53	0.4823	Non-antigen
	RNIIQQLKNQVLFLL	18.3	0.3982	Non-antigen
	EITQYIQSYKGFVDI	43.9	0.03	Non-antigen
	CVRNIIQQLKNQVLF	32.16	0.5359	Antigen	Allergen
	LENLKLSINHKITEE	16.23	0.599	Antigen
NLRP1
Alllele	Epitope	Binding affinity	Vaxijen Score	Antigenicty	Allergenicity	IFN-γ induction	Interleukin-4	Interleukin-10	Toxicity
DRB1_0101	LPHFVALQGGHVDTS	3.3	1.0023	Antigen	Non-allergen	Negative
	HLPHFVALQGGHVDT	3.52	1.2254	Antigen	Allergen
	LKEFQLLLANKAHSR	2.09	0.552	Antigen	Allergen
	PHFVALQGGHVDTSL	3.69	0.9398	Antigen	Allergen
	ELKEFQLLLANKAHS	2.26	0.6557	Antigen	Non-allergen	Negative
	KEFQLLLANKAHSRS	2.16	0.6498	Antigen	Allergen
	VHLPHFVALQGGHVD	4.01	1.1587	Antigen	Allergen
	EPRIVILQGAAGIGK	4.83	0.3299	Non-antigen
	EELKEFQLLLANKAH	2.5	0.6874	Antigen	Non-allergen	Negative
	QEPRIVILQGAAGIG	6.35	0.242	Non-antigen
	PRIVILQGAAGIGKS	4.67	0.3796	Non-antigen
	EVVLDKLHGQVLSQE	11.44	0.2905	Non-antigen
	TQEPRIVILQGAAGI	7.23	0.3667	Non-antigen
	KMGILQEHPIPLSYS	7.05	0.6168	Antigen	Allergen
	QEQYERVLAENTRPS	26.51	0.6496	Antigen	Non-allergen	Positive	Inducer	Inducer	Non-toxin
	HFVALQGGHVDTSLF	3.89	0.522	Antigen	Non-allergen	Negative
	VEVVLDKLHGQVLSQ	11.97	0.2404	Non-antigen
	SQEQYERVLAENTRP	30.89	0.6138	Antigen	Non-allergen	Negative
	GRRWREISASLLYQA	7.24	0.4639	Non-antigen
	LKMGILQEHPIPLSY	7.89	0.4789	Non-antigen
	GKTILPEASFLITAR	6.85	-0.1457	Non-antigen
	EEGMLLEKPARVELH	8.53	0.7272	Antigen	Allergen
	EFQLLLANKAHSRSS	2.47	0.7383	Antigen	Allergen
	SGRRWREISASLLYQ	8.34	0.4854	Non-antigen
	LDLSFNVLTDAGAKH	49.98	0.8259	Antigen	Non-allergen	Negative
	DLSFNVLTDAGAKHL	35.73	0.5457	Antigen	Non-allergen	Negative
DRB1_0301	MSYVLEDEKGRGKHS	203.06	0.9578	Antigen	Non-allergen	Positive	Non-inducer
	AMSYVLEDEKGRGKH	224.59	0.9695	Antigen	Non-allergen	Positive	Non-inducer
	SYVLEDEKGRGKHSN	325.13	1.1125	Antigen	Non-allergen	Positive	Non-inducer
	AAMSYVLEDEKGRGK	295.57	0.7311	Antigen	Allergen
DRB1_0401	LDLSFNVLTDAGAKH	172.42	0.8259	Antigen
	DLSFNVLTDAGAKHL	139.55	0.5457	Antigen	Non-allergen	Negative
	LKEFQLLLANKAHSR	14.43	0.552	Antigen
	ELDLSFNVLTDAGAK	202.55	0.79	Antigen	Allergen
	EYFYRYFTDERQAIR	249.3	0.4074	Non-antigen
	IRAFRLVKSNKELWA	23.06	0.56	Antigen	Non-allergen	Positive	Inducer	Non-inducer
DRB1_0701	LYQALKETHPHLIME	7.8	1.0311	Antigen	Allergen
	IRAFRLVKSNKELWA	13.36	0.56	Antigen
	VLLYHRVHPEEVTFH	28.99	0.4706	Non-antigen
	ALRFIPVTSVVLLYH	6.41	-0.1295	Non-antigen
	YQALKETHPHLIMEL	7.27	1.1109	Antigen	Non-allergen	Negative
	QAIRAFRLVKSNKEL	15.4	0.5991	Antigen	Non-allergen	Negative
	AIRAFRLVKSNKELW	14.15	0.5696	Antigen	Non-allergen	Negative
	VVLLYHRVHPEEVTF	26.25	0.3793	Non-antigen
	GLYQALKETHPHLIM	7.51	1.1467	Antigen	Non-allergen	Positive	Inducer	Inducer	Non-toxin
	SVVLLYHRVHPEEVT	30.86	0.3382	Non-antigen
	NALRFIPVTSVVLLY	6.07	-0.0738	Non-antigen
	HNALRFIPVTSVVLL	5.54	-0.0265	Non-antigen
	EQLIARVTSVEVVLD	18.38	0.3703	Non-antigen
	RQAIRAFRLVKSNKE	16.16	0.711	Antigen	Non-allergen	Negative
	IHNALRFIPVTSVVL	5.02	0.2939	Non-antigen
	RAFRLVKSNKELWAL	16.7	0.6604	Antigen	Non-allergen	Positive	Non-inducer
	DGLYQALKETHPHLI	9.43	1.2978	Antigen	Non-allergen	Positive	Inducer	Inducer	Non-toxin
	QEQYERVLAENTRPS	288.38	0.6496	Antigen
DRB1_0801	TLVWEALVKPGDLMP	128.65	0.4695	Non-antigen
	SGIYYTEIREREREK	486.49	0.9498	Antigen	Non-allergen	Positive	Inducer	Non-inducer
	ETLVWEALVKPGDLM	133.63	0.4123	Non-antigen
	TSGIYYTEIRERERE	479.81	0.8335	Antigen	Allergen
	DETLVWEALVKPGDL	180.48	0.6153	Antigen	Non-allergen	Negative
	CYLEFLKKEELKEFQ	173.5	1.0333	Antigen	Allergen
	LVWEALVKPGDLMPA	168.27	0.5154	Antigen	Allergen
	YLEFLKKEELKEFQL	162.06	0.8462	Antigen	Allergen
	ETSGIYYTEIRERER	487.33	0.7789	Antigen	Non-allergen	Negative
	GIYYTEIREREREKS	600.71	1.0276	Antigen	Non-allergen	Positive	Inducer	Non-inducer
	IRAFRLVKSNKELWA	32.59	0.56	Antigen
DRB1_0901	SFPYSPSEPHLGSPS	728.59	0.3747	Non-antigen
	PSFPYSPSEPHLGSP	722.13	0.3855	Non-antigen
	IHGLFGASTTRFLLG	33.83	-0.449	Non-antigen
DRB1_1001	LKEFQLLLANKAHSR	4.11	0.552	Antigen
	QILFSVLKVTRNLKE	4.42	0.309	Non-antigen
	ELKEFQLLLANKAHS	4.63	0.6557	Antigen
	KEFQLLLANKAHSRS	4.45	0.6498	Antigen
	WQILFSVLKVTRNLK	4.33	0.6843	Antigen	Non-allergen	Negative
	EPRIVILQGAAGIGK	27.43	0.3299	Non-antigen
	LPHFVALQGGHVDTS	13.73	1.0023	Antigen
	QEQYERVLAENTRPS	34.31	0.6496	Antigen
	HLPHFVALQGGHVDT	15.03	1.2254	Antigen
	EELKEFQLLLANKAH	5.32	0.6874	Antigen
	SQEQYERVLAENTRP	37.59	0.6138	Antigen
	SLLYQALPSSPDHES	16.45	0.3978	Non-antigen
	ILFSVLKVTRNLKEL	4.92	0.3444	Non-antigen
	QEPRIVILQGAAGIG	36.64	0.242	Non-antigen
	PHFVALQGGHVDTSL	17.01	0.9398	Antigen
	ASLLYQALPSSPDHE	15.29	0.3557	Non-antigen
	LDLSFNVLTDAGAKH	68.41	0.8259	Antigen
	YWQILFSVLKVTRNL	5.17	0.665	Antigen	Non-allergen	Negative
	VHLPHFVALQGGHVD	17.34	1.1587	Antigen
	DLSFNVLTDAGAKHL	57.74	0.5457	Antigen
	PRIVILQGAAGIGKS	30.17	0.3796	Non-antigen
	EQYERVLAENTRPSQ	41.18	0.672	Antigen	Non-allergen	Positive	Inducer	Inducer	Non-toxin
	LSQEQYERVLAENTR	37.67	0.5824	Antigen	Non-allergen	Negative
	SASLLYQALPSSPDH	15.86	0.4214	Non-antigen
	VLLYHRVHPEEVTFH	25.01	0.4706	Non-antigen
DRB1_1101	EFQLLLANKAHSRSS	9.58	0.7383	Antigen
	KEFQLLLANKAHSRS	8.48	0.6498	Antigen
	EASFLITARTTALQN	22.39	0.4501	Non-antigen
	SGIYYTEIREREREK	299.28	0.9498	Antigen
	KFQFVRIHKPPPLTP	17.14	1.1885	Antigen	Non-allergen	Negative
	LKEFQLLLANKAHSR	8.88	0.552	Antigen
	PEASFLITARTTALQ	24.93	0.351	Non-antigen
	MKFQFVRIHKPPPLT	16.11	1.0864	Antigen	Allergen
	TSGIYYTEIRERERE	334.72	0.8335	Antigen
	PKELELCYRSPGEDQ	112.26	0.2586	Non-antigen
DRB1_1201	EPRIVILQGAAGIGK	152.41	0.3299	Non-antigen
	QEPRIVILQGAAGIG	179.09	0.242	Non-antigen
	AQANLKLLDVSKIFP	101.13	0.344	Non-antigen
DRB1_1301	ATEVVDKEKNLYRVH	136.55	0.9525	Antigen	Allergen
	VATEVVDKEKNLYRV	162.04	0.8017	Antigen	Allergen
	KPQLLIFSRRKPSVM	6	0.3039	Non-antigen
	EKPQLLIFSRRKPSV	7.83	0.3274	Non-antigen
	PVATEVVDKEKNLYR	317.29	0.6963	Antigen	Allergen
	TEVVDKEKNLYRVHF	128.29	0.8626	Antigen	Non-allergen	Positive	Inducer	Non-inducer
	QEKPQLLIFSRRKPS	14.03	0.2539	Non-antigen
	YTEIREREREKSEKG	207.04	1.2437	Antigen	Non-allergen	Positive	Inducer	Non-inducer
	PQLLIFSRRKPSVMT	6.06	0.3844	Non-antigen
DRB1_1401	LACYLEFLKKEELKE	165.44	1.042	Antigen	Allergen
	ACYLEFLKKEELKEF	153.25	0.9773	Antigen	Allergen
DRB1_1501	LGEINPQHSWMVAGP	31.43	0.6087	Antigen	Allergen
	GKTILPEASFLITAR	15.66	-0.1457	Non-antigen
	EKTLEAYGIHGLFGA	63.72	-0.2826	Non-antigen
	FLGEINPQHSWMVAG	29.51	0.5432	Antigen	Allergen
	LGKTILPEASFLITA	20.93	-0.3581	Non-antigen
	GEINPQHSWMVAGPL	51.2	0.2935	Non-antigen
	LEKTLEAYGIHGLFG	80.1	-0.2782	Non-antigen
	EPRIVILQGAAGIGK	39.64	0.3299	Non-antigen
NLRP3
Alllele	Epitope	Binding affinity	Vaxijen Score	Antigenicty	Allergenicity	IFN-γ induction	Interleukin-4	Interleukin-10	Toxicity
DRB1_0301	CEGLLHPDCKLQVLE	33.4	1.1769	Antigen	Allergen
	EGLLHPDCKLQVLEL	26.37	1.1553	Antigen	Non-allergen	Positive	Inducer	Inducer	Non-toxin
DRB1_0401	EYFFKYFSDEAQARA	60.31	0.6329	Antigen	Non-allergen	Positive	Inducer	Non-inducer
	RGLFSVLSTSQSLTE	18.33	0.3014	Non-antigen
	LTRLYVGENALGDSG	100.26	-0.1831	Non-antigen
DRB1_0701	EASLLITTRPVALEK	20.38	0.0577	Non-antigen
	FDISLVLSSNQKLVE	33.53	0.6699	Antigen	Non-allergen	Negative
DRB1_0801	PVALEKLQHLLDHPR	362.59	0.758	Antigen	Non-allergen	Negative
	SLLITTRPVALEKLQ	55.7	0.0971	Non-antigen
	RPVALEKLQHLLDHP	388.8	0.9796	Antigen	Non-allergen	Negative
DRB1_1001	RGLFSVLSTSQSLTE	7.39	0.3014	Non-antigen
	TRLYVGENALGDSGV	38.86	-0.3009	Non-antigen
	LTRLYVGENALGDSG	41.59	-0.1831	Non-antigen
	CRGLFSVLSTSQSLT	7.71	0.1264	Non-antigen
DRB1_1101	PNPPIHKIVRKPSRI	13.92	0.985	Antigen	Non-allergen	Positive	Inducer	Inducer	Non-toxin
	NPPIHKIVRKPSRIL	10.27	0.7689	Antigen	Allergen
	DPNPPIHKIVRKPSR	20.72	0.9312	Antigen	Allergen
	EASLLITTRPVALEK	21.32	0.0577	Non-antigen
	PEASLLITTRPVALE	29.72	0.2229	Non-antigen
DRB1_1301	LGESVSLNKRYTRLR	8.54	0.7464	Antigen	Non-allergen	Positive	Inducer	Inducer	Non-toxin
	PNPPIHKIVRKPSRI	32.31	0.985	Antigen
	WIEVKAKAKKLQIQP	16.01	1.1546	Antigen	Allergen
	NPPIHKIVRKPSRIL	9.34	0.7689	Antigen
	GESVSLNKRYTRLRL	5.48	0.6311	Antigen	Non-allergen	Positive	Inducer	Inducer
	KWIEVKAKAKKLQIQ	12.42	1.3002	Antigen	Allergen
	LKWIEVKAKAKKLQI	11.11	1.2315	Antigen	Allergen
	DPNPPIHKIVRKPSR	56.47	0.9312	Antigen
	LLKWIEVKAKAKKLQ	13.63	1.3505	Antigen	Allergen
	IEVKAKAKKLQIQPS	20.68	1.1485	Antigen	Allegen
	RLGESVSLNKRYTRL	21.98	0.6265	Antigen	Non-allergen	Positive	Inducer	Inducer
DRB1_1401	EASLLITTRPVALEK	30.54	0.0577	Non-antigen
	PEASLLITTRPVALE	35.04	0.2229	Non-antigen

## Sheet: MHCI
MHC-I (NetMHCpan-4.1)
CARD8
Alllele	Epitope	Binding affinity	Vaxijen Score	Antigenicty	Allergenicity (allertop)	IFN-γ induction	Interleukin-4	Interleukin-10	Toxicity
HLA-A*01:01	LIDKSTNRY	40.28	0.4325	Non-antigen													IFN-γ induction
	ITSNTLIYY	27.88	-0.28	Non-antigen
	ETEAEPLLF	356.73	0.6173	Antigen	Non-allergen	Non-inducer
HLA-A*02:01	SLMGILLRI	5.63	-0.4613	Non-antigen
	MVLEHPARV	30.75	1.1531	Antigen	Non-allergen	Inducer	Inducer	All are non-inducer	Non-toxin
	FLVRDEVTV	12.38	0.0156	Non-antigen
	YLVPSDALL	12.32	0.2161	Non-antigen
	KVMPKELKL	1021.19	0.7942	Antigen	Non-allergen	Non-inducer
	GQMKEPIQL	437.15	0.8133	Antigen	Non-allergen	Non-inducer
	VLESPSFSL	172.64	0.6517	Antigen	Allergen
	SISERDPYL	274.56	1.2339	Antigen	Allergen
	TVYRELPCV	95.18	0.4257	Non-antigen
HLA-A*03:01	SIRELQYTK	137.42	1.1676	Antigen	Allergen
	ALLSMVEKK	147.91	0.4349	Non-antigen
	VLFRSISER	89.81	0.4435	Non-antigen
	SANLKVMPK	111.95	0.6638	Antigen	Allergen
	IVSNSANLK	75.6	1.2824	Antigen	Allergen
	AVAEIHLPH	601.76	0.0604	Non-antigen
	QIVSSYASK	226.57	0.3848	Non-antigen
HLA-A*24:02	QYTKTGIFF	51.8	-0.6868	Non-antigen
	YYHPHPEDI	101.9	0.2955	Non-antigen
	QWLVGGPLF	61.25	-1.0688	Non-antigen
	RSPGEIQHF	1799.98	0.7376	Antigen	Allergen
	LWSATGLGF	111.18	-0.645	Non-antigen
	LYLVPSDAL	701.18	0.3533	Non-antigen
	AFGSWSQHL	1087.71	0.3052	Non-antigen
	IHLPHFISL	3116.32	1.7722	Antigen	Non-allergen	Non-inducer
HLA-A*26:01	EIQHFSKFY	350.36	1.1783	Antigen	Allergen
	EVKPVDLQL	1978.48	0.796	Antigen	Allergen
	ETLCDISHF	91.52	2.0844	Antigen	Allergen
	ITSNTLIYY	1059.34	-0.28	Non-antigen
	EENQIVSSY	3835.9	0.3691	Non-antigen
	MPKELKLSY	7735.47	0.8719	Antigen	Allergen
	DVSWFLVAH	1416.48	0.6622	Antigen	Allergen
	ETEAEPLLF	4836.26	0.6173	Antigen
HLA-B*07:02	HPEDIKFHL	1047.22	1.1338	Antigen	Allergen
	HPHPEDIKF	2777.86	0.7363	Antigen	Allergen
	MPKELKLSY	1254.61	0.8719	Antigen
	SPSFSLMGI	74.33	0.151	Non-antigen
HLA-B*08:01	NLKVMPKEL	115.31	0.4955	Non-antigen
	FVKENHRQL	89.53	1.1243	Antigen	Non-allergen	Non-inducer
	VSYLRQQNL	968.62	0.5877	Antigen	Non-allergen	Non-inducer
	KVMPKELKL	3680.22	0.7942	Antigen
	IHLPHFISL	3964.46	1.7722	Antigen
	MPKELKLSY	3091.8	0.8719	Antigen
	HPEDIKFHL	9457.27	1.1338	Antigen
	DIKFHLYLV	365.56	0.8592	Antigen	Allergen
	ARVEPFYAV	168.23	1.2211	Antigen	Allergen
	IRLQGSRKL	327.45	0.601	Antigen	Allergen
	YRSPGEIQH	2838.78	0.4222	Non-antigen
	ERDPYLVSY	4524.43	1.0381	Antigen	Non-allergen	Inducer	Inducer		Non-toxin
	LRIASGTRL	109.38	0.5766	Antigen	Allergen
	VRDEVTVTI	3904.95	0.2767	Non-antigen
	VRLQTSPPM	238.93	0.3697	Non-antigen
	SRNIDASKL	2086.79	0.1111	Non-antigen
HLA-B*39:01	IHLPHFISL	48.2	1.7722	Antigen
	VRDEVTVTI	178.01	0.2767	Non-antigen
	TRQSKNEAL	101.57	1.4379	Antigen	Non-allergen	Non-inducer
	FRAVPECQL	109.89	0.671	Antigen	Allergen
	ARVEPFYAV	171.04	1.2211	Antigen	Allergen
	GQMKEPIQL	919.75	0.8133	Antigen
	SKNEALLSM	331.6	0.5004	Antigen	Allergen
	MKEPIQLEI	470.12	0.1294	Non-antigen
	ERDPYLVSY	4884.85	1.0381	Antigen
	HPEDIKFHL	2175.25	1.1338	Antigen
	SRNIDASKL	1712.79	0.1111	Non-antigen
	EHPARVEPF	2346.68	1.3157	Antigen	Allergen
	NHRQLQARM	2592.15	0.4693	Non-antigen
	LRIASGTRL	642.67	0.5766	Antigen
	VRLQTSPPM	237.73	0.3697	Non-antigen
HLA-B*40:01	GEVDVSWFL	6.26	-0.0335	Non-antigen
	VEKKGDLAL	59.93	0.6133	Antigen	Allergen
	AEIHLPHFI	50.65	0.9716	Antigen	Allergen
	GEIQHFSKF	129.9	1.545	Antigen	Allergen
	LESPSFSLM	34.39	0.6721	Antigen	Non-allergen	Non-inducer
	EEAVAEIHL	202.23	0.122	Non-antigen
	GQMKEPIQL	994.69	0.8133	Antigen
	DETEAEPLL	1139.1	0.1962	Non-antigen
HLA-B*58:01	QAGEVDVSW	19.33	0.1061	Non-antigen
	KSTNRYSVW	9.37	0.9625	Antigen	Non-allergen	Non-inducer
	ITSNTLIYY	80.06	-0.28	Non-antigen
	SVWFPTAGW	76.48	0.0486	Antigen	Allergen
	RSPGEIQHF	886.75	0.7376	Antigen
	SSYASKVCF	196.55	0.4317	Non-antigen
	TVTIAFGSW	107.55	-0.7862	Non-antigen
HLA-B*15:01	LQYTKTGIF	8.79	-0.1452	Non-antigen
	GQMKEPIQL	551.3	0.8133	Antigen
NAIP
Alllele	Epitope	Binding affinity	Vaxijen Score	Antigenicty	Allergenicity	IFN-γ induction	Interleukin-4	Interleukin-10	Toxicity
HLA-A*01:01	KSSEEITQY	1069.99	0.5609	Antigen	Allergen
	ASDERISQF	1522.5	0.8997	Antigen	Non-allergen	Inducer	Inducer		Non-toxin
	ASPDLSTGY	1942.17	0.2986	Non-antigen
	ALAKAGLFY	550.72	-0.1698	Non-antigen
	YCNDSIFAY	836.16	0.5507	Antigen	Non-allergen	Non-inducer
	FVDITGEHF	1333.65	0.3695	Non-antigen
	TLGALNLQY	945.66	-0.105	Non-antigen
	FSDSFFQAV	83.95	0.7151	Antigen	Non-allergen	Non-inducer
	SAYNNFLNY	1394.43	1.0285	Antigen	Non-allergen	Non-inducer
HLA-A*02:01	FLQGRTLTL	13.09	-0.1882	Non-antigen
	FLLDDYKEI	7.32	0.9672	Antigen	Allergen
	KLIQNSPNL	30.57	1.2578	Antigen	Allergen
	QLLRGLWQI	6.21	-0.1812	Non-antigen
	VLLKKIAFL	20.47	-0.6442	Non-antigen
	NLLPELSAL	44.53	1.2248	Antigen	Allergen
	KLSPKQYKI	178.13	1.0267	Antigen	Non-allergen	Non-inducer
	LLPELSALL	14.9	0.7388	Antigen	Allergen
	SLLDISSDL	36.2	1.0887	Antigen	Allergen
	YILGSLSNL	21.7	1.023	Antigen	Allergen
	KIVSHLLHL	102.98	0.3735	Non-antigen
	IVSHLLHLV	33.8	0.7857	Antigen	Non-allergen	Non-inducer
	SQDQIFPNL	584.28	0.2606	Non-antigen
	SLSQCVLRL	79.12	0.0972	Non-antigen
	FLCLKELSV	24.94	-0.5554	Non-antigen
	YVQGISPCV	40.51	0.8795	Antigen	Allergen
	YFFDHPESL	270.19	1.035	Antigen	Allergen
	LLDADDIAL	42.94	0.8829	Antigen	Allergen
	DMLEILMTV	43.34	0.8364	Antigen	Non-allergen	Non-inducer
	GLWQICPQA	52.49	0.2357	Non-antigen
	FISLKILNL	172.19	-0.4346	Non-antigen
	KAFPFYNTV	112.58	0.5622	Antigen	Non-allergen	Non-inducer
	HLVDNKESL	1047.01	1.0279	Antigen	Non-allergen	Non-inducer
	FLSPAFQEF	286.81	0.6426	Antigen	Allergen
	SMVSEHLLV	42.82	-0.3065	Non-antigen
	KIQKTPLFV	258.38	-0.1765	Non-antigen
	VLPEVFGNL	103.22	0.1361	Non-antigen
	AVGPIVPEM	1628.27	-0.1657	Non-antigen
	NLAEKEDNV	341.66	1.5655	Antigen	Allergen
HLA-A*03:01	KLFSHNMTR	9.95	0.1215	Non-antigen
	SIASKHISK	27.52	-0.0038	Non-antigen
	QVIGKLIQK	105.05	-0.2215	Non-antigen
	AVFKSYMER	77.55	0.2779	Non-antigen
	SLPNFISLK	29.04	1.4371	Antigen	Non-allergen	Non-inducer
	YVSSLPSTK	153.2	0.6754	Antigen	Allergen
	ITQYIQSYK	26.48	0.2673	Non-antigen
	SVTKCSISK	86.33	0.6892	Antigen	Allergen
	GSGKTVLLK	186.33	0.2122	Non-antigen
	ILFGAGLTR	149.7	-0.3325	Non-antigen
	ALAKAGLFY	73.17	-0.1698	Non-antigen
	RLRGGKMRY	178.97	1.583	Antigen	Allergen
	GLDAVQLAK	157.14	0.3297	Non-antigen
	AVGVAALAK	162.35	-0.5297	Non-antigen
	CSIPQVIGK	151.84	1.1269	Antigen	Allergen
	SAYNNFLNY	111.61	1.0285	Antigen
	IICDQLLEK	261.12	-0.7688	Non-antigen
	AAYTSASFR	133.61	0.5629	Antigen	Allergen
HLA-A*24:02	KYLTILQKW	23.57	0.3235	Non-antigen
	RYLETILEI	9.95	0.5501	Antigen	Allergen
	VFSVIPEEF	43.01	0.3807	Non-antigen
	VYFGKNQSL	187.03	0.6522	Antigen	Non-allergen	Inducer	Inducer		Non-toxin
	QYIQSYKGF	178.23	-0.3088	Non-antigen
	YFFDHPESL	518	1.035	Antigen
	VIPEEFPNF	360.78	0.7272	Antigen	Allergen
	FLSPAFQEF	179.08	0.6426	Antigen
	DYLKHQPEI	549.51	0.5647	Antigen	Allergen
	RYQEEEARL	643.61	0.8867	Antigen	Non-allergen	Non-inducer
	PFVASLPNF	244.58	1.5178	Antigen	Non-allergen	Non-inducer
	KWFPKCEFL	232.65	0.5188	Antigen	Allergen
	FYRFLSPAF	118.07	0.9882	Antigen	Non-allergen	Non-inducer
	VFHLKCNFF	151.47	1.4012	Antigen	Allergen
	KYDIRVKNL	3132.51	0.6038	Antigen	Allergen
	YFSMVSEHL	325.7	0.6657	Antigen	Non-allergen	Non-inducer
	FQYPFDPSF	1241.88	0.9841	Antigen	Non-allergen	Non-inducer
	AYNNFLNYV	611.02	1.1728	Antigen	Non-allergen	Non-inducer
	QQLKNQVLF	1039.91	-0.0165	Non-antigen
HLA-A*26:01	EITQYIQSY	17.13	0.6632	Antigen	Allergen
	ETILEIKAF	20.73	0.2554	Non-antigen
	EVFGNLNSV	54.15	1.2793	Antigen	Allergen
	SAYNNFLNY	741.32	1.0285	Antigen
	MTVSAYNNF	68.14	1.2682	Antigen	Allergen
	DVAVFKSYM	179.13	0.0814	Non-antigen
	EIKFSDSFF	239.56	0.1256	Non-antigen
	QIFPNLDKF	2837.77	1.1689	Antigen	Allergen
	FTAQRLRPF	38.68	0.6918	Antigen	Allergen
	ETSEKFAYI	141.2	1.2355	Antigen	Allergen
	SAFEPMNEW	5593.73	0.5372	Antigen	Non-allergen	Inducer	Inducer		Non-toxin
	VTYEPYSSW	3911.55	0.35	Non-antigen
	ASPDLSTGY	3084.68	0.2986	Non-antigen
	LLIQISAEY	905.99	0.1926	Non-antigen
	FLSPAFQEF	2323.06	0.6426	Antigen
	QVPTIDQDY	4979.3	0.4893	Non-antigen
	YTSASFRHM	362.91	0.5902	Antigen	Allergen
	DSFFQAVPF	548.86	1.1158	Antigen	Non-allergen	Non-inducer
	QAVPFVASL	3263.64	0.517	Antigen	Non-allergen	Inducer	Inducer		Non-toxin
	MVSEHLLVL	1019.51	-0.1453	Non-antigen
	EMAAAGFYF	467.91	0.1023	Non-antigen
	SPMMTVSAY	1700.9	0.493	Non-antigen
	ESAVGVAAL	552.26	-0.6022	Non-antigen
	ESIRPALEL	2463.18	0.5984	Antigen	Non-allergen	Inducer	Inducer		Non-toxin
	YCNDSIFAY	5228.13	0.5507	Antigen
	VIPEEFPNF	4351.68	0.7272	Antigen	Allergen
	EEFPNFHHM	7827.07	1.1422	Antigen	Allergen
	KSSEEITQY	13567.6	0.5609	Antigen
HLA-B*07:02	SPRAHFSVL	1.92	0.3205	Non-antigen
	KPVQEPLVL	90.23	-0.151	Non-antigen
	LPRLIRLNM	8.71	1.4736	Antigen	Non-allergen	Inducer	Inducer		Non-toxin
	SPNLHVFHL	41.31	0.884	Antigen	Allergen
	HPQSKYLTI	43.56	0.8105	Antigen	Non-allergen	Non-inducer
	GPKIVSHLL	119.26	-0.7618	Non-antigen
	RPDEGLASI	58.04	-0.138	Non-antigen
	WPRESAVGV	32.56	0.5189	Antigen	Non-allergen	Inducer	Inducer		Non-toxin
	RARDIRRYL	44.82	1.098	Antigen	Non-allergen	Non-inducer
	SASFRHMSL	97.01	0.6866	Antigen	Non-allergen	Non-inducer
	SPKQYKIPC	160.81	0.4809	Non-antigen
	SPMMTVSAY	92.52	0.493	Non-antigen
	CPLLNRFQL	65.45	0.832	Antigen	Allergen
HLA-B*08:01	SASFRHMSL	11.91	0.6866	Antigen
	FLQGRTLTL	20.19	-0.1882	Non-antigen
	SPRAHFSVL	10.57	0.3205	Non-antigen
	HPQSKYLTI	77.72	0.8105	Antigen
	FISLKILNL	114.12	-0.4346	Non-antigen
	SPNLHVFHL	271.88	0.884	Antigen
	YFFDHPESL	953.3	1.035	Antigen
	TVLLKKIAF	462.02	-0.7216	Non-antigen
	DGIYRVAKL	746	1.6647	Antigen	Allergen
	VLLKKIAFL	172.57	-0.6442	Non-antigen
	LAGMRLIEL	112.09	-0.3551	Non-antigen
	QLKNQVLFL	388.83	0.1225	Non-antigen
	IQQLKNQVL	908.62	0.8906	Antigen	Non-allergen	Non-inducer
	MVSEHLLVL	308.37	-0.1453	Non-antigen
	LQKIQKTPL	142.2	0.1975	Non-antigen
	LPRLIRLNM	177.84	1.4736	Antigen
	VYFGKNQSL	5190.48	0.6522	Antigen
	HLKQINSPM	127.58	0.4953	Non-antigen
	GPKIVSHLL	2095.91	-0.7618	Non-antigen
	DIRRYLETI	383.29	0.9006	Antigen	Non-allergen	Non-inducer
	ELLLTLPSL	1318.1	0.1936	Non-antigen
	HNMTRLRKF	376.59	1.4483	Antigen	Non-allergen	Non-inducer
	NFLNYVSSL	682.2	1.6789	Antigen	Allergen
	NLLPELSAL	2002.8	1.2248	Antigen
	DNMPNLQEL	3579.8	1.6939	Antigen	Allergen
HLA-B*27:05	KRLKTFVTY	82.26	-0.3836	Non-antigen
	NRFQLVFYL	25.44	0.6875	Antigen	Allergen
	QRLRPFYRF	53.75	0.6838	Antigen	Allergen
	KRFHPDCGF	156.82	0.1536	Non-antigen
	LRLPRLIRL	77.66	1.5166	Antigen	Non-allergen	Inducer	Non-inducer
	QRIELHLNH	547.85	-0.0086	Non-antigen
	TRLRKFMVY	100.35	0.2075	Non-antigen
	VRNIIQQLK	201.44	0.929	Antigen	Allergen
	ARLASFRNW	337.36	1.563	Antigen	Non-allergen	Non-inducer
	SRLRGGKMR	200.23	1.7375	Antigen	Allergen
	MRYQEEEAR	472.43	0.9283	Antigen	Non-allergen	Inducer	Inducer		Non-toxin
	TRLPIEDHK	2340.24	-0.2642	Non-antigen
HLA-B*39:01	HQDLGLYHL	57.04	-0.1353	Non-antigen
	NHLSRTCLL	62.77	0.3757	Non-antigen
	YFFDHPESL	185.93	1.035	Antigen
	NRFQLVFYL	39.75	0.6875	Antigen
	FHHMEKLLI	133.75	0.3926	Non-antigen
	SQDQIFPNL	294.83	0.2606	Non-antigen
	DHPESLSLL	1525.51	1.1282	Antigen	Allergen
	LKHQPEISL	569.4	0.4215	Non-antigen
	HQPEISLQM	548.19	0.1565	Non-antigen
	ERHPQSKYL	2314.13	0.206	Non-antigen
	FQYPFDPSF	358.49	0.9841	Antigen
	FHPDCGFLL	200.43	0.744	Antigen	Allergen
	SEHLLVLAL	345.42	-0.146	Non-antigen
	AQATTVKSL	923.58	0.612	Antigen	Non-allergen	Non-inducer
	LQFLQGRTL	362.82	-0.4189	Non-antigen
	KPVQEPLVL	2442.64	-0.151	Non-antigen
	RPDEGLASI	938.81	-0.138	Non-antigen
	IQQLKNQVL	1289.73	0.8906	Antigen
	AHFSVLETC	3087.19	0.5573	Antigen	Allergen
	DNMPNLQEL	2365.8	1.6939	Antigen
	YHLKQINSP	2578.61	0.5164	Antigen	Allergen
	HLVDNKESL	1644.03	1.0279	Antigen
HLA-B*40:01	AEQELLLTL	7.97	0.1407	Non-antigen
	SEHLLVLAL	8.72	-0.146	Non-antigen
	QEFLAGMRL	12.33	-0.2526	Non-antigen
	AEYDPSKLV	235.15	0.6981	Antigen	Non-allergen	Non-inducer
	KEDNVKSYM	122.57	1.1007	Antigen	Non-allergen	Non-inducer
	EEFPNFHHM	405.84	1.1422	Antigen
	GEAGSGKTV	213.86	0.7906	Antigen	Allergen
	TEIKFSDSF	121.61	0.1922	Non-antigen
	QELDISRHF	946.63	0.4894	Non-antigen
	LETTSESNL	119.55	1.1958	Antigen	Allergen
	SESNLEDSI	84.27	0.5945	Antigen	Allergen
	PEISLQMQL	459.59	0.3842	Non-antigen
	KEICSIPQV	124.55	0.9168	Antigen	Allergen
	QEPLVLPEV	719.09	0.0117	Non-antigen
HLA-B*58:01	VTYEPYSSW	7.74	0.35	Non-antigen
	SAFEPMNEW	15.15	0.5372	Antigen
	KSSEEITQY	53.82	0.5609	Antigen
	ACSPFVLQF	536.23	1.0878	Antigen	Non-allergen	Non-inducer
	LLKKIAFLW	129.9	-0.5019	Non-antigen
	FVAAICAHW	19.94	0.6454	Antigen	Allergen
	KYLTILQKW	617.5	0.3235	Non-antigen
	LSLLRSIHF	117.81	1.2106	Antigen	Non-allergen	Non-inducer
	ASDERISQF	1818.95	0.8997	Antigen
	LTLPSLESL	174.87	0.5524	Antigen	Non-allergen	Non-inducer
	GALNLQYFF	43.85	0.3186	Non-antigen
	RAAYTSASF	29.25	0.313	Non-antigen
	MTVSAYNNF	52.64	1.2682	Antigen
	ASFRNWPFY	113.13	1.0201	Antigen	Allergen
HLA-B*15:01	FQYPFDPSF	18.07	0.9841	Antigen
	LLIQISAEY	11.91	0.1926	Non-antigen
	FLSPAFQEF	14.71	0.6426	Antigen
	RLRGGKMRY	94.94	1.583	Antigen
	MQKGYNSQM	17.4	1.0216	Antigen	Non-allergen	Non-inducer
	ALAKAGLFY	34.6	-0.1698	Non-antigen
	GVKSGIQCF	117.82	0.9271	Antigen	Non-allergen	Non-inducer
	ILNLEGQQF	152.62	0.3428	Non-antigen
	GIKDIVQCF	173.36	0.6711	Antigen	Allergen
	AQATTVKSL	99.53	0.612	Antigen
	QQLKNQVLF	201.56	-0.0165	Non-antigen
	VLSEAGFVF	21.34	-0.4129	Non-antigen
	KSSEEITQY	507.63	0.5609	Antigen
	SAYNNFLNY	47.87	1.0285	Antigen
	RAAYTSASF	10.98	0.313	Non-antigen
	LQFLQGRTL	81.82	-0.4189	Non-antigen
	HQPEISLQM	519.82	0.1565	Non-antigen
	LVLALKTAY	130.51	-0.2379	Non-antigen
	LLNRFQLVF	21.02	0.3891	Non-antigen
	TLGALNLQY	303.87	-0.105	Non-antigen
	RLRKFMVYF	80.18	0.07	Non-antigen
	FQKLENLKL	438.88	1.3894	Antigen	Allergen
	HLKQINSPM	35.72	0.4953	Non-antigen
	KERHPQSKY	2419.33	0.4371	Non-antigen
	WQICPQAYF	10.75	0.8201	Antigen	Non-allergen	Non-inducer
	QIFPNLDKF	854.48	1.1689	Antigen
NLRP1
Alllele	Epitope	Binding affinity	Vaxijen Score	Antigenicty	Allergenicity	IFN-γ induction	Interleukin-4	Interleukin-10	Toxicity
HLA-A*01:01	VVDKEKNLY	87.17	1.2042	Antigen	Non-allergen	Non-inducer
	FSESSRKEY	235.13	0.4539	Non-antigen
	SLESLHCLY	53.45	1.2233	Antigen	Allergen
	PLDETSGIY	186.88	0.6926	Antigen	Allergen
	TTTTLCLHY	70.36	-0.2514	Non-antigen
	ESSRKEYFY	197.55	0.8297	Antigen	Allergen
	TSGMEVASY	532.64	0.4711	Non-antigen
	DLEKTLEAY	1734.7	0.7955	Antigen	Allergen
	LDETSGIYY	1466.96	1.0164	Antigen	Non-allergen	Non-inducer
	PVTSVVLLY	762.23	-1.0036	Non-antigen
	QEHPIPLSY	12288.6	0.5629	Antigen	Non-allergen	Inducer	Inducer		Non-toxin
	AIDDLEMKF	4248.26	0.9145	Antigen	Allergen
	EAWGRGQLY	3521.72	0.1056	Non-antigen
	VASYLVAQY	1739.86	-0.3728	Non-antigen
	HVDTSLFQM	1788.1	-0.1423	Non-antigen
HLA-A*02:01	VLMPWIHEL	2.39	0.8126	Antigen	Non-allergen	Inducer	Inducer		Non-toxin
	MLLEKPARV	8.6	1.0022	Antigen	Allergen
	ALQNLIPSL	16.68	0.7835	Antigen	Allergen
	NLMQWVPSL	5.04	1.2582	Antigen	Allergen
	ILQEHPIPL	12.3	0.5337	Antigen	Non-allergen	Inducer	Inducer		Non-toxin
	QLIARVTSV	24.97	0.6272	Antigen	Allergen
	VLQEPSSEL	91.88	0.8085	Antigen	Allergen
	NLDDVGVRL	161.66	0.9057	Antigen	Non-allergen	Non-inducer
	NLIPSLEQA	88.75	1.1536	Antigen	Non-allergen	Non-inducer
	ILPEASFLI	7.07	0.2215	Non-antigen
	ALKETHPHL	334.08	1.2423	Antigen	Non-allergen	Non-inducer
	FVMREAVTV	12.39	-0.3479	Non-antigen
	QLLLQPHSL	347.67	0.6835	Antigen	Allergen
	SQMRKLFSL	14.45	0.3317	Non-antigen
	VLLKMIHNA	37.86	0.6192	Antigen	Non-allergen	Non-inducer
	YLIPSDCSI	12.62	1.191	Antigen	Non-allergen	Inducer	Inducer		Non-toxin
	RLLFILDGV	6.01	0.3202	Non-antigen
	GLDTQEPRI	803.69	0.7003	Antigen	Non-allergen	Non-inducer
	SVLSASPSL	321.65	0.7354	Antigen	Allergen
	ALEQEKPQL	2592.66	0.6751	Antigen	Non-allergen	Non-inducer
	SLAPREQEA	1036.63	0.4615	Non-antigen
	VLDKLHGQV	303.64	0.6971	Antigen	Non-allergen	Non-inducer
HLA-A*03:01	ALLGSLLGK	16.89	-0.3691	Non-antigen
	SLFQMAHFK	8.65	1.1458	Antigen	Allergen
	VLSASPSLK	13.05	0.8526	Antigen	Non-allergen	Inducer	Non-inducer
	MSNSTSSLK	30.9	0.926	Antigen	Non-allergen	Non-inducer
	NTRPSQMRK	193.07	0.8718	Antigen	Allergen
	AIRAFRLVK	41.16	0.7883	Antigen	Non-allergen	Non-inducer
	GLFGASTTR	323.43	0.1375	Non-antigen
	RSQDPLVKR	1401.76	0.4351	Non-antigen
	QLLIFSRRK	81.1	-0.3112	Non-antigen
	VLKVTRNLK	112.95	0.9318	Antigen	Allergen
HLA-A*24:02	SYSFIHLCF	8.52	-0.1592	Non-antigen
	RWPNTGLCF	46.39	0.3299	Non-antigen
	AWDLALHTW	328.39	0.6428	Antigen	Non-allergen	Non-inducer
	PYSPSEPHL	2242.16	0.2425	Non-antigen
	LFGASTTRF	108.1	0.1099	Non-antigen
	QWVPSLQLL	488.79	0.1202	Non-antigen
	SFSPLGVLL	511.09	-0.2376	Non-antigen
	LYETRNKTF	1035.49	0.8262	Antigen	Non-allergen	Non-inducer
	LYGDRFQHV	345.38	0.9987	Antigen	Allergen
	TWSPTMVVL	671.94	0.0192	Non-antigen
	KMIHNALRF	118.1	1.0356	Antigen	Allergen
	SWMVAGPLL	82.24	-0.8018	Non-antigen
	TWPWKNEDF	779.95	-0.3479	Non-antigen
	VLMPWIHEL	438.97	0.8126	Antigen	Non-allergen	Inducer	Inducer		Non-toxin
	RVHPEEVTF	4145.86	0.8073	Antigen	Non-allergen	Non-inducer
	KLFSLSQSW	832.78	0.75	Antigen	Allergen
HLA-A*26:01	EAYGIHGLF	49.41	-0.2955	Non-antigen
	EAWGRGQLY	197.17	0.1056	Non-antigen
	QVMAHFEEM	157.76	0.7676	Antigen	Allergen
	EINPQHSWM	327.71	0.4385	Non-antigen
	EAVTVEIEF	2709.73	0.0248	Non-antigen
	VASYLVAQY	2513.52	-0.3728	Non-antigen
	TVSGSGSGM	658.04	1.3135	Antigen	Allergen
	EVVDKEKNL	5458.66	1.5583	Antigen	Allergen
	HLIEIRDLF	1109.61	1.044	Antigen	Allergen
	HPIPLSYSF	7199.46	0.8508	Antigen	Allergen
	AIISTFLKM	1509.32	-0.1195	Non-antigen
	TTTTLCLHY	1625.86	-0.2514	Non-antigen
	PVTSVVLLY	2975.55	-1.0036	Non-antigen
	DLEKTLEAY	3215.65	0.7955	Antigen
	ESSRKEYFY	3572.92	0.8297	Antigen
	ELKEFQLLL	2887.26	0.6211	Antigen	Allergen
	QEHPIPLSY	19452.5	0.5629	Antigen
	EGAGHSPSF	3028.79	1.4294	Antigen	Non-allergen	Non-inducer
HLA-B*07:02	TPAPIRQIL	9.31	0.1784	Non-antigen
	RPRCLLETL	4.11	1.1913	Antigen	Non-allergen	Inducer	Inducer		Non-toxin
	RPSQMRKLF	8.88	0.704	Antigen	Allergen
	TPPQAHTSL	53.9	0.01	Non-antigen
	SPSQPTSTA	32.81	0.5758	Antigen	Non-allergen	Non-inducer
	SPNAPTSTA	32.87	0.4307	Non-antigen
	HPIPLSYSF	65	0.8508	Antigen
	SPEVVPVEL	353.22	0.0262	Non-antigen
	SPLDAPQLL	322.39	0.5483	Antigen	Non-allergen	Non-inducer
	HPACKLIRL	40.3	1.9683	Antigen	Non-allergen	Inducer	Inducer		Non-toxin
	SPSLKELDL	175.32	0.4817	Non-antigen
	SPLGVLLKM	147.84	0.2332	Non-antigen
	HPRSQDPLV	94.65	0.2779	Non-antigen
	HPEEVTFHL	822.94	0.7638	Antigen	Non-allergen	Non-inducer
	RPERLLFIL	48.29	0.7964	Antigen	Allergen
	QPSCKLQRL	375.49	1.4774	Antigen	Non-allergen	Non-inducer
	QPQPADALL	679.48	0.537	Antigen	Non-allergen	Non-inducer
	IPVTSVVLL	454.35	-1.5311	Non-antigen
	RLRQPSCKL	83.66	1.4262	Antigen	Allergen
	QPTSTAVLM	539.84	-0.2238	Non-antigen
	RANQTLTEL	333.95	0.0858	Non-antigen
HLA-B*08:01	LAQSKVVSL	53.13	0.2056	Non-antigen
	LLKMIHNAL	7.8	1.0591	Antigen	Non-allergen	Non-inducer
	DFNQKFTQL	592.97	0.7289	Antigen	Non-allergen	Non-inducer
	SQMRKLFSL	10.55	0.3317	Non-antigen
	QLIARVTSV	60.51	0.6272	Antigen
	QLLLQPHSL	354.67	0.6835	Antigen
	EMRQELRAL	52.3	0.9234	Antigen	Allergen
	EILPKELEL	1571.16	0.5389	Antigen	Non-allergen	Inducer	Inducer		Non-toxin
	FSRRKPSVM	23.26	-0.0632	Non-antigen
	QQMKRKEKL	380.76	1.0339	Antigen	Non-allergen	Non-inducer
	LITARTTAL	48.37	0.0423	Non-antigen
	HPACKLIRL	198.26	1.9683	Antigen	Non-allergen	Inducer	Inducer		Non-toxin
	ELKEFQLLL	658.19	0.6211	Antigen
	SRHVKKLQL	499.36	0.2487	Non-antigen
	ILQEHPIPL	411.73	0.5337	Antigen
	HPIPLSYSF	1827.37	0.8508	Antigen
	TPAPIRQIL	1978.12	0.1784	Non-antigen
	SPSLKELDL	1710.24	0.4817	Non-antigen
	MLLEKPARV	324.6	1.0022	Antigen
	ALKETHPHL	1425.79	1.2423	Antigen
	TPPQAHTSL	2365.44	0.01	Non-antigen
	VLMPWIHEL	736.52	0.8126	Antigen
	NLMQWVPSL	172.42	1.2582	Antigen
	QILSRPERL	2180.62	1.65	Antigen	Non-allergen	Non-inducer
	QPSCKLQRL	994.69	1.4774	Antigen
	TQEPRIVIL	3703.99	0.941	Antigen	Non-allergen	Non-inducer
	SCKLQRLQL	828.46	1.4751	Antigen	Non-allergen	Non-inducer
	MKRKEKLTL	399.82	0.4295	Non-antigen
	EMKFQFVRI	250.52	0.7584	Antigen	Allergen
	TSSLKRQRL	1383.86	0.6021	Antigen	Non-allergen	Non-inducer
	HNALRFIPV	34.91	1.0392	Antigen	Non-allergen	Non-inducer
	VHLPHFVAL	4352.01	1.4601	Antigen	Allergen
	SPEVVPVEL	10658.9	0.0262	Non-antigen
	SASLLYQAL	1061.73	-0.0715	Non-antigen
HLA-B*27:05	ARWVEVLGF	26.31	0.3985	Non-antigen
	SRKEYFYRY	217.23	0.5924	Antigen	Allergen
	DRFQHVFYF	307.86	1.2593	Antigen	Allergen
	SRHVKKLQL	302.58	0.2487	Non-antigen
	HRSTWSPTM	81.33	-0.1649	Non-antigen
	ARIAVPSPL	82.37	0.549	Antigen	Allergen
	ARTTALQNL	442.52	1.0386	Antigen	Allergen
	GRLACYLEF	34.18	0.9454	Antigen	Allergen
	LRFIPVTSV	376.68	0.3274	Non-antigen
	ARVELHHIV	189.61	0.6861	Antigen	Non-allergen	Non-inducer
	KRQRLGSER	78.03	0.9518	Antigen	Allergen
	VRIHKPPPL	543.32	1.4236	Antigen	Allergen
	IRLQVKDKK	661.21	1.2083	Antigen	Non-allergen	Non-inducer
	YRSPGEDQL	3554.72	0.2481	Non-antigen
HLA-B*39:01	VHLPHFVAL	30.42	1.4601	Antigen
	HHHPWEPSV	80.21	0.3595	Non-antigen
	YRSPGEDQL	83.05	0.2481	Non-antigen
	THPHLIMEL	232.67	0.9761	Antigen	Allergen
	HRSTWSPTM	34.91	-0.1649	Non-antigen
	GHLGSGIRL	428.95	0.4846	Non-antigen
	TQEPRIVIL	275.95	0.941	Antigen
	YHRVHPEEV	431.56	0.3968	Non-antigen
	LHTWEQMGL	112.78	0.6097	Antigen	Allergen
	MQWVPSLQL	83.78	0.245	Non-antigen
	MREAVTVEI	67.56	-0.0846	Non-antigen
	ARIAVPSPL	84.53	0.549	Antigen
	EQARWVEVL	56.18	1.1178	Antigen	Non-allergen	Inducer	Inducer		Non-toxin
	HKPPPLTPL	716.35	1.4721	Antigen	Non-allergen	Non-inducer
	SQMRKLFSL	35.07	0.3317	Non-antigen
	SPEVVPVEL	1407.2	0.0262	Non-antigen
	HPEEVTFHL	595.17	0.7638	Antigen
	AHFKEEGML	2114.75	0.2627	Non-antigen
	IRDLFGPGL	619.53	-0.8426	Non-antigen
	TPAPIRQIL	968.45	0.1784	Non-antigen
	VKDKKDETL	2936.06	1.3621	Antigen	Non-allergen	Inducer	Inducer		Non-toxin
	SQPQPADAL	1149.79	0.581	Antigen	Allergen
	WREISASLL	92.17	0.0219	Non-antigen
	LHWSQPQPA	338.77	0.432	Non-antigen
	DRFQHVFYF	1185.86	1.2593	Antigen
	HPIPLSYSF	733.16	0.8508	Antigen
	VRIHKPPPL	728.52	1.4236	Antigen
	SQEQYERVL	619.74	0.7333	Antigen	Non-allergen	Non-inducer
	LRFIPVTSV	1429.7	0.3274	Non-antigen
	SPLDAPQLL	3049.28	0.5483	Antigen
	TPPQAHTSL	1995.64	0.01	Non-antigen
	AQALQAQPL	236.04	0.3653	Non-antigen
	CKDGLYQAL	190.68	0.9574	Antigen	Allergen
	ARVELHHIV	789.21	0.6861	Antigen
	NLDDVGVRL	2330.13	0.9057	Antigen
	SRHVKKLQL	3622.82	0.2487	Non-antigen
	SQPTSTAVL	995.12	-0.0181	Non-antigen
	TRNLKELDL	2075.06	0.2672	Non-antigen
	VLMPWIHEL	396.29	0.8126	Antigen	Non-allergen	Inducer	Inducer		Non-toxin
	SKTTTTLCL	517.64	-0.3963	Non-antigen
HLA-B*40:01	LEFLKKEEL	48.65	0.3632	Non-antigen
	LEQEKPQLL	159.58	0.9223	Antigen	Allergen
	LEAYGIHGL	19	-0.3992	Non-antigen
	KEELKEFQL	143.48	0.7853	Antigen	Allergen
	LEKPARVEL	108.82	1.274	Antigen	Allergen
	WEQMGLRSL	14.96	0.0466	Non-antigen
	GEDQLFSEF	58.86	0.0941	Non-antigen
	LENPSFSPL	11.7	0.6231	Antigen	Non-allergen	Inducer	Inducer		Non-toxin
	KETHPHLIM	49.46	1.1744	Antigen	Non-allergen	Non-inducer
	YETRNKTFL	48.46	0.1314	Non-antigen
	EELKEFQLL	222.58	0.7657	Antigen	Allergen
	KEAWGRGQL	45.67	-0.4764	Antigen	Allergen
	WEPSVRESL	103.92	0.4592	Non-antigen
	EEVTFHLYL	52.66	0.26	Non-antigen
	AEESSPEVV	213.31	0.9413	Antigen	Allergen
	GEREMENIF	240.92	0.127	Non-antigen
	AENTRPSQM	1244.22	0.8747	antigen	Non-allergen	Inducer	Inducer		Non-toxin
	RELAQSKVV	192.06	-0.0756	Non-antigen
	AEPGAVEAV	379.15	0.6517	Antigen	Allergen
	AEDCKDLAF	170.42	1.3994	Antigen	Non-allergen	Non-inducer
	TELDLSFNV	159.51	0.6124	Antigen	Allergen
	GEINPQHSW	2341.78	0.368	Non-antigen
	SERRVLRQL	889.27	0.1229	Non-antigen
	QEHPIPLSY	3790.59	0.5629	Antigen
	QEKPQLLIF	2163.49	0.8012	Antigen	Allergen
	QEPSSELCL	974.41	0.2096	Non-antigen
	VEAVHLPHF	667.14	0.7416	Antigen	Non-allergen	Non-inducer
	MENIFHCRL	34.81	0.274	Non-antigen
	REMENIFHC	234.37	0.4889	Non-antigen
	SESSRKEYF	1591.42	0.9612	Antigen	Allergen
HLA-B*58:01	TSTAVLGSW	6.32	-0.3936	Non-antigen
	KLFSLSQSW	12.11	0.75	Antigen
	TSTAVLMPW	3.77	-0.3083	Non-antigen
	KTILPEASF	28.85	-0.045	Non-antigen
	KSEKGRPPW	36.74	-0.0414	Non-antigen
	LARQVKEAW	68.18	0.1414	Non-antigen
	LVKSNKELW	92.13	0.4159	Non-antigen
	RVHPEEVTF	213.87	0.8073	Antigen
	LSRPERLLF	113.03	1.0781	Antigen	Non-allergen	Non-inducer
	PSSELCLHW	53.81	-0.0773	Non-antigen
	CSLAAEGIW	5.45	-0.307	Non-antigen
	PTMVVLFRW	29.29	0.1323	Non-antigen
	SLQPHHHPW	327.41	0.9023	Antigen	Allergen
	KSNKELWAL	48.44	0.0022	Non-antigen
	LCLVPWVSW	120.45	0.4698	Non-antigen
	SQGRNLMQW	332.22	0.2392	Non-antigen
	AQYGEQRAW	1192.86	0.6018	Antigen	Non-allergen	Inducer	Inducer		Non-toxin
HLA-B*15:01	GQVLSQEQY	101.76	0.5649	Antigen	Allergen
	RVHPEEVTF	151.11	0.8073	Antigen
	KLLDVSKIF	149.93	0.5518	Antigen	Allergen
	KMIHNALRF	24.41	1.0356	Antigen
	QEHPIPLSY	1295.23	0.5629	Antigen
	AQYGEQRAW	494.32	0.6018	Antigen	Non-allergen
	HLIEIRDLF	87.95	1.044	Antigen
	KTILPEASF	123.57	-0.045	Non-antigen
	KLFSLSQSW	248.29	0.75	Antigen
	MQWVPSLQL	146.88	0.245	Non-antigen
	VASYLVAQY	155.5	-0.3728	Non-antigen
	SQMRKLFSL	52.83	0.3317	Non-antigen
	ALKETHPHL	627.02	1.2423	Antigen
	REISASLLY	161.87	-0.1367	Non-antigen
	AQPEKTSGM	760.17	0.7914	Antigen	Non-allergen	Non-inducer
NLRP3
Alllele	Epitope	Binding affinity	Vaxijen Score	Antigenicty	Allergenicity	IFN-γ induction	Interleukin-4	Interleukin-10	Toxicity
HLA-A*01:01	FSEAKRKEY	877.96	0.6741	Antigen	Non-allergen	Non-inducer
	TSHSLTRLY	739.09	0.8733	Antigen	Allergen
	TNQNLTHLY	1421.51	0.3779	Non-antigen
	TSKTTTAVY	2204.89	0.3548	Non-antigen
	FQEFFAAMY	335.52	0.7712	Antigen	Allergen
	QLELFYCLY	282.1	1.1325	Antigen	Non-allergen	Non-inducer
	LVNQERTSY	4730.53	0.3475	Non-antigen
HLA-A*02:01	FLMDGFDEL	2.2	1.5106	Antigen	Allergen
	HLLDHPRHV	74.55	1.329	Antigen	Allergen
	GLLEYLSRI	7.44	1.1406	Antigen	Non-allergen	Non-inducer
	KLLPEASLL	37.06	0.1064	Non-antigen
	ALGDFGIRL	63.98	-0.075	Non-antigen
	TLQEEKPEL	224.23	1.2395	Antigen	Allergen
	SLGDPGMRV	122.42	0.6571	Antigen	Allergen
	KLPSRDVTV	95.14	0.3362	Non-antigen
	SLGDLIMSC	146.88	-0.2488	Non-antigen
	TLLTSSQSL	248.19	0.3495	Non-antigen
	GLCAHLWGL	11.71	-0.0038	Non-antigen
	SLIQENEVL	332.42	0.5218	Antigen	Allergen
	ALEKLQHLL	465.08	1.1891	Antigen	Allergen
	LVNSGLTSV	122.75	-0.0167	Non-antigen
	TLGDKGIKL	1223.38	0.698	Antigen	Non-allergen	Non-inducer
	LLPEASLLI	36.06	-0.0126	Non-antigen
	RLYVGENAL	125.52	-0.2471	Non-antigen
	SQLELFYCL	22.88	1.0621	Antigen	Non-allergen	Non-inducer
	YLIFVVRFL	17.52	-0.3117	Non-antigen
	SVLSTSHSL	781.67	1.1591	Antigen	Allergen
	FTMCFIPLV	2.97	0.4109	Non-antigen
	RAMDYFPKI	99.2	1.6946	Antigen	Non-allergen	Non-inducer
HLA-A*03:01	ILLSSLIRK	17.34	-0.4282	Non-antigen
	TTRPVALEK	96.59	0.4661	Non-antigen
	LLSSLIRKK	55.34	-0.0845	Non-antigen
	RISICKMKK	30.42	0.221	Non-antigen
	LTSSQSLRK	82.22	0.7274	Antigen	Non-allergen	Non-inducer
	SLVLSSNQK	154.12	0.7727	Antigen	Allergen
	KMKKDYRKK	194.01	0.5641	Antigen	Non-allergen	Inducer	Inducer		Non-toxin
	YLSRISICK	46.07	-0.187	Non-antigen
	HLEDYPPQK	784.63	0.0964	Non-antigen
HLA-A*24:02	FYSFIHMTF	7.51	0.8646	Antigen	Allergen
	LYQDRFDYL	90.72	1.2566	Antigen	Allergen
	GYLIFVVRF	718.42	-0.6896	Non-antigen
	IQPSQLELF	240.22	0.8127	Antigen	Allergen
	KFEKGYLIF	224.73	-1.006	Non-antigen
	YFPKIEINL	970.16	-0.0505	Non-antigen
	VYVFFLSSL	112.63	-0.037	Non-antigen
	AWAMAVWIF	72.34	-0.1147	Non-antigen
	IHMTFQEFF	296.16	0.1758	Non-antigen
HLA-A*26:01	ESVSLNKRY	269.09	0.3451	Non-antigen
	DVTVLLENY	370.9	0.8186	Antigen	Non-allergen	Inducer	Inducer		Non-toxin
	ETKSALETL	766.21	0.8266	Antigen	Non-allergen	Inducer	Inducer		Non-toxin
	TSHSLTRLY	1512.33	0.8733	Antigenicty
	LVNQERTSY	4378.55	0.3475	Non-antigen
	TTTAVYVFF	783.01	-0.6611	Non-antigen
	FIHMTFQEF	722.63	0.3687	Non-antigen
	TSKTTTAVY	2564.29	0.3548	Non-antigen
	SAFLRMNLF	1541.01	0.3971	Non-antigen
	STRCKLARY	472.62	1.6898	Antigen	Allergen
HLA-B*07:02	HPDCKLQVL	126.4	1.5332	Antigen	Allergen
	LPSRDVTVL	73.62	-0.2539	Non-antigen
	IVRKPSRIL	79.44	0.9	Antigen	Non-allergen	Non-inducer
	KPSRILFLM	71.67	0.6168	Antigen	Allergen
	LPRGQTEKA	357.29	0.6845	Antigen	Allergen
	SPIKMELLF	382.17	-0.3038	Non-antigen
HLA-B*27:05	KRKEYFFKY	53.79	0.3135	Non-antigen
	ARLGESVSL	374.24	0.7068	Antigen	Allergen
	VRKPSRILF	600.57	0.6838	Antigen	Non-allergen	Non-inducer
	SRFQCIEDR	172.63	1.5944	Antigen	Non-allergen	Non-inducer
	KRYTRLRLI	24.43	0.7253	Antigen	Non-allergen	Inducer	Non-inducer
	SRISICKMK	125.94	-0.1679	Non-antigen
	GRTNVPGSR	385.11	0.4589	Non-antigen
	ARVSNPTVI	1112.45	1.2257	Antigen	Allergen
	YRKYVRSRF	218.79	0.2774	Non-antigen
	TRLRLIKEH	744.27	0.9271	Antigen	Non-allergen	Non-inducer
	TRCKLARYL	241.71	1.0223	Antigen	Allergen
HLA-B*39:01	EHSEPVHTV	78.89	0.8053	Antigen	Allergen
	SHAACSHGL	28.44	0.0646	Non-antigen
	ARLGESVSL	130.49	0.7068	Antigen
	DHVDLATLM	361.3	0.4327	Non-antigen
	SHGLVNSHL	358.73	0.0597	Non-antigen
	QQMESGKSL	74.33	0.7612	Antigen	Non-allergen	Non-inducer
	AHLWGLCSL	55.59	0.3715	Non-antigen
	DHPRHVEIL	1072.6	0.9879	Antigen	Allergen
	SQQEREQEL	759.83	1.0745	Antigen	Non-allergen	Non-inducer
	NQNLTHLYL	74.13	-0.2207	Non-antigen
	SHSLTRLYV	200.3	0.1359	Non-antigen
	HPDCKLQVL	189.54	1.5332	Antigen
	RHLDMVQCV	667.35	1.3376	Antigen	Non-allergen	Non-inducer
	EREQELLAI	478.18	0.4354	Non-antigen
	DHMVSSFCI	54.81	0.2912	Non-antigen
	QKADVSAFL	250.24	0.5795	Antigen	Allergen
	FNYETKSAL	195.72	0.0735	Non-antigen
	AQARAAFSL	73.95	-0.4869	Non-antigen
	SQLELFYCL	41.02	1.0621	Antigen
	QRSLGDLIM	301.56	-0.8734	Non-antigen
	SQSLRKLSL	739.31	0.3293	Non-antigen
	CHRVESLSL	473.59	0.981	Antigen	Allergen
	FLMDGFDEL	73.87	1.5106	Antigen	Allergen
	IHMTFQEFF	987.26	0.1758	Non-antigen
	DRFDYLFYI	574.86	2.3787	Antigen	Non-allergen	Non-inducer
	QKAERGDIL	855.26	1.2376	Antigen	Allergen
	ARVSNPTVI	1830.58	1.2257	Antigen
HLA-B*40:01	QENEVLFTM	16.81	0.4322	Non-antigen
	QEHGLCAHL	55.35	0.3399	Non-antigen
	TEKADHVDL	183.22	1.5304	Antigen	Allergen
	IEINLSTRM	118.46	0.3782	Non-antigen
	QEEKPELTV	469.3	0.743	Antigen	Allergen
	LEYLSRISI	45.34	0.6248	Antigen	Non-allergen	Non-inducer
	SEPVHTVVF	283.53	0.2084	Non-antigen
	EEDFVQRAM	270.85	-0.0113	Non-antigen
	VESLSLGFL	39.59	-0.448	Non-antigen
	IEEEWMGLL	55.84	0.6543	Antigen	Allergen
	HECCFDISL	18.39	0.3921	Non-antigen
	QQMESGKSL	609.64	0.7612	Antigen	Non-allergen	Non-inducer
HLA-B*58:01	LTVVFEPSW	4.06	0.3643	Non-antigen
	KAKRDEPKW	26.76	0.7515	Antigen	Non-allergen	Non-inducer
	KTTTAVYVF	7.51	-0.5419	Non-antigen
	CSLAADGIW	5.33	-0.1397	Non-antigen
	QIRLELLKW	566.63	0.6139	Antigen	Non-allergen	Inducer	Inducer		Non-toxin
	MCFIPLVCW	154.78	1.2262	Antigen	Allergen
	LARKMMLDW	45.28	-0.672	Non-antigen
	TTTAVYVFF	102.17	-0.6611	Non-antigen
	LLCNLKKLW	356.17	0.8954	Antigen	Non-allergen	Non-inducer
HLA-B*15:01	LQKADVSAF	4.03	0.3846	Non-antigen
	LVNQERTSY	64.25	0.3475	Non-antigen
	LQNLGLSEM	20.19	0.0341	Non-antigen
	TSKTTTAVY	66.8	0.3548	Non-antigen
	QQMESGKSL	85.98	0.7612	Antigen
	FIHMTFQEF	17.18	0.3687	Non-antigen
	TLYQDRFDY	192.62	0.4568	Non-antigen
	RMDHMVSSF	48.66	1.0617	Antigen	Allergen
	IQPSQLELF	418.09	0.8127	Antigen
	AQARAAFSL	66.53	-0.4869	Non-antigen
HLA-B*08:01	HLYLRGNTL	16.64	0.7221	Antigen	Allergen
	DLKKFKMHL	103	0.0722	Non-antigen
	SLNKRYTRL	27.67	0.476	Non-antigen
	YIHCREVSL	10.4	0.8807	Antigen	Non-allergen	Non-inducer
	SQSLRKLSL	84.08	0.3293	Non-antigen
	LITTRPVAL	110.76	-0.1168	Non-antigen
	EVKAKAKKL	574.84	1.5925	Antigen	Allergen
	YVRSRFQCI	8.34	1.1473	Antigen	Non-allergen	Non-inducer
	TILARKMML	82.14	-0.6355	Non-antigen
	VALEKLQHL	1304.96	1.0311	Antigen	Allergen
	HPDCKLQVL	564.79	1.5332	Antigen
	SSNQKLVEL	1006.48	0.7371	Antigen	Allergen
	DCKLQVLEL	1551.25	1.6656	Antigen	Allergen
	SQQEREQEL	2434.77	1.0745	Antigen
	EAKRKEYFF	689.17	0.411	Non-antigen
	DVDLKKFKM	5196.44	-0.0206	Non-antigen
	KAKAKKLQI	1287.77	1.4412	Antigen	Non-allergen	Inducer	Non-inducer
	VLKQQSCLL	224.42	0.724	Antigen	Allergen
	SSLIRKKLL	621.13	-0.7711	Non-antigen
	DPNPPIHKI	14909.1	0.9112	Antigen	Allergen
	HLLDHPRHV	2669.28	1.329	Antigen	Allergen
	VNQERTSYL	1337.69	0.4982	Non-antigen
	NGEEKAWAM	2025.29	0.9069	Antigen	Non-allergen	Inducer	Inducer		Non-toxin
	SAFLRMNLF	781.69	0.3971	Non-antigen
